# Supplementary material for: Enhancing the proliferation of MC3T3-E1 cells on casein phosphopeptide-biofunctionalized 3D reduced-graphene oxide/polypyrrole scaffolds
Source: Royal Society of Chemistry journal article supplement (doi:10.1039/c7ra02146a), 2017-01-01
Supplement: c7ra02146a1.pdf [file c7ra02146a1.pdf]

## Enhancing proliferation of MC3T3-E1 cells on Casein phosphopeptide-biofunctionalized 3D reduced-graphene oxide/polypyrrole scaffold

### Support Information

Weibo Jie,<sup>a,d</sup>† Fuxiang Song,<sup>b,c</sup>† Xiaocheng Li,<sup>c</sup> Wen Li,<sup>b</sup> Rui Wang,<sup>b</sup> Yanjiao Jiang,<sup>b</sup> Libo Zhao,<sup>b</sup> Zengjie Fan,<sup>b</sup> Jizeng Wang,<sup>a\*</sup> Bin Liu,<sup>b\*</sup>

*a. Key Laboratory of Mechanics on Disaster and Environment in Western China, the Ministry of Education, College of Civil Engineering and Mechanics, Lanzhou University, Lanzhou 730000, China. Email: jzwang@lzu.edu.cn*

*b. School of Stomatology of Lanzhou university. Lanzhou 730000, China. Email: liubkq@lzu.edu.cn*

*c. Laboratory of Clean Energy chemistry and Materials, Lanzhou Institute of Chemical Physics Chinese Academy of Sciences. Lanzhou, China, 730000. Email: xiaocheng@licp.cas.cn*

*d. Lanzhou university second hospital, Lanzhou 730000, China. Email: jiewb@lzu.edu.cn*

† These authors contributed equally to this work.

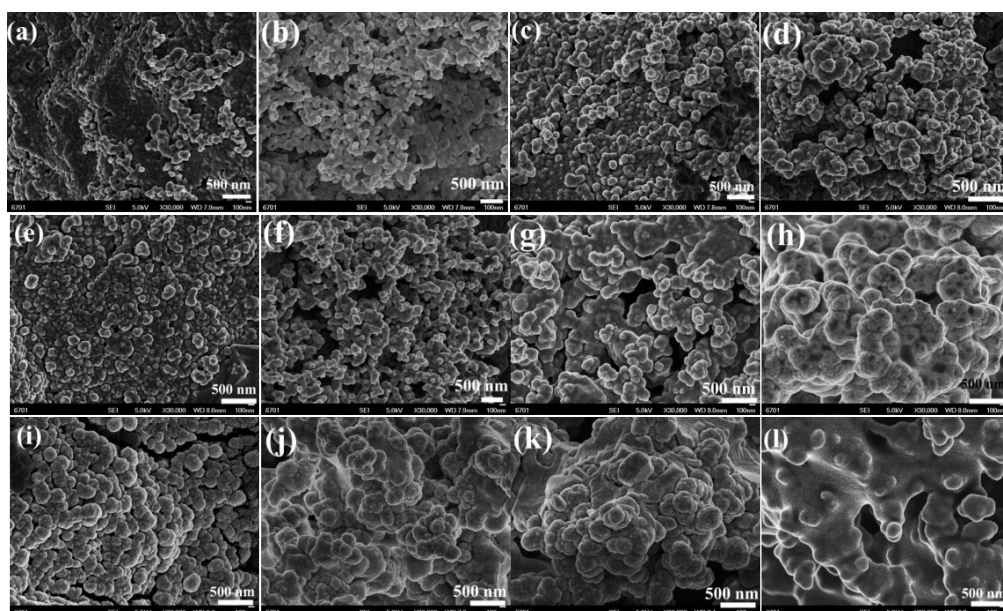

Fig. S1 Low-magnification SEM images of 3D rGO/PPY (the first row), 3D rGO/PPY/CPP10 (the second row), and 3D rGO/PPY/CPP20 (the third row) composite scaffolds after being soaked in 1.5xSBF at 37 °C for 1 d, 3 d, 5 d, and 7 d, respectively.

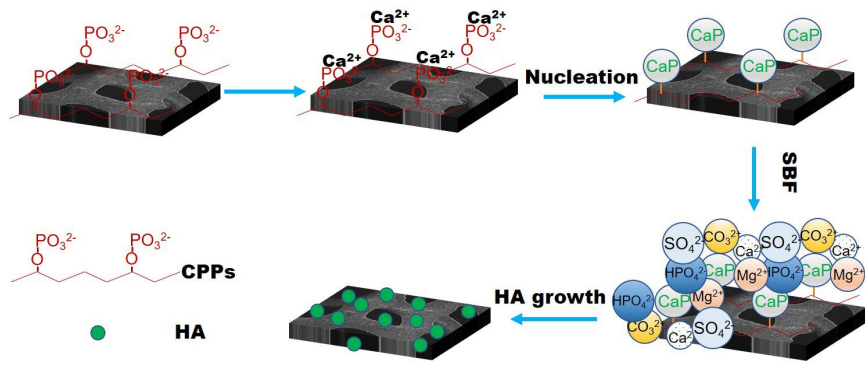

Fig. S2 Growth mechanism of HA on backbone of the CPP-modified 3D rGO/PPY scaffold.
